# Supplementary material for: Reduced cerebello-cerebral functional connectivity correlates with disease severity and impaired white matter integrity in Friedreich ataxia
Source: Springer Nature journal article supplement (doi:10.1007/s00415-023-11637-x), 2023-03-01
Supplement: MOESM1 [file 415_2023_11637_MOESM1_ESM.pdf]

# **Reduced cerebello-cerebral functional connectivity correlates with disease severity and impaired white matter integrity in Friedreich ataxia**

**Journal of Neurology**

Rebecca Kerestes<sup>\*1</sup>, Hannah Cummins<sup>\*1</sup>, Nellie Georgiou-Karistianis<sup>2</sup>, Louisa P. Selvadurai<sup>1</sup>, Louise A Corben<sup>3</sup>, Martin B Delatycki<sup>3</sup>, Gary F Egan<sup>2,4</sup>, and Ian H Harding<sup>1,4</sup>

<sup>\*</sup>Equal Contribution

1 Department of Neuroscience, Central Clinical School, Monash University, Melbourne

2 Turner Institute for Brain and Mental Health, School of Psychological Sciences, Monash University, Melbourne

3 Bruce Lefroy Centre for Genetic Health Research, Murdoch Children's Research Institute, Melbourne

4 Monash Biomedical Imaging, Monash University, Melbourne

Correspondence to: Dr. Ian Harding

Department of Neuroscience, Monash University, VIC 3800

[ian.harding@monash.edu](mailto:ian.harding@monash.edu)

## Supplementary Information

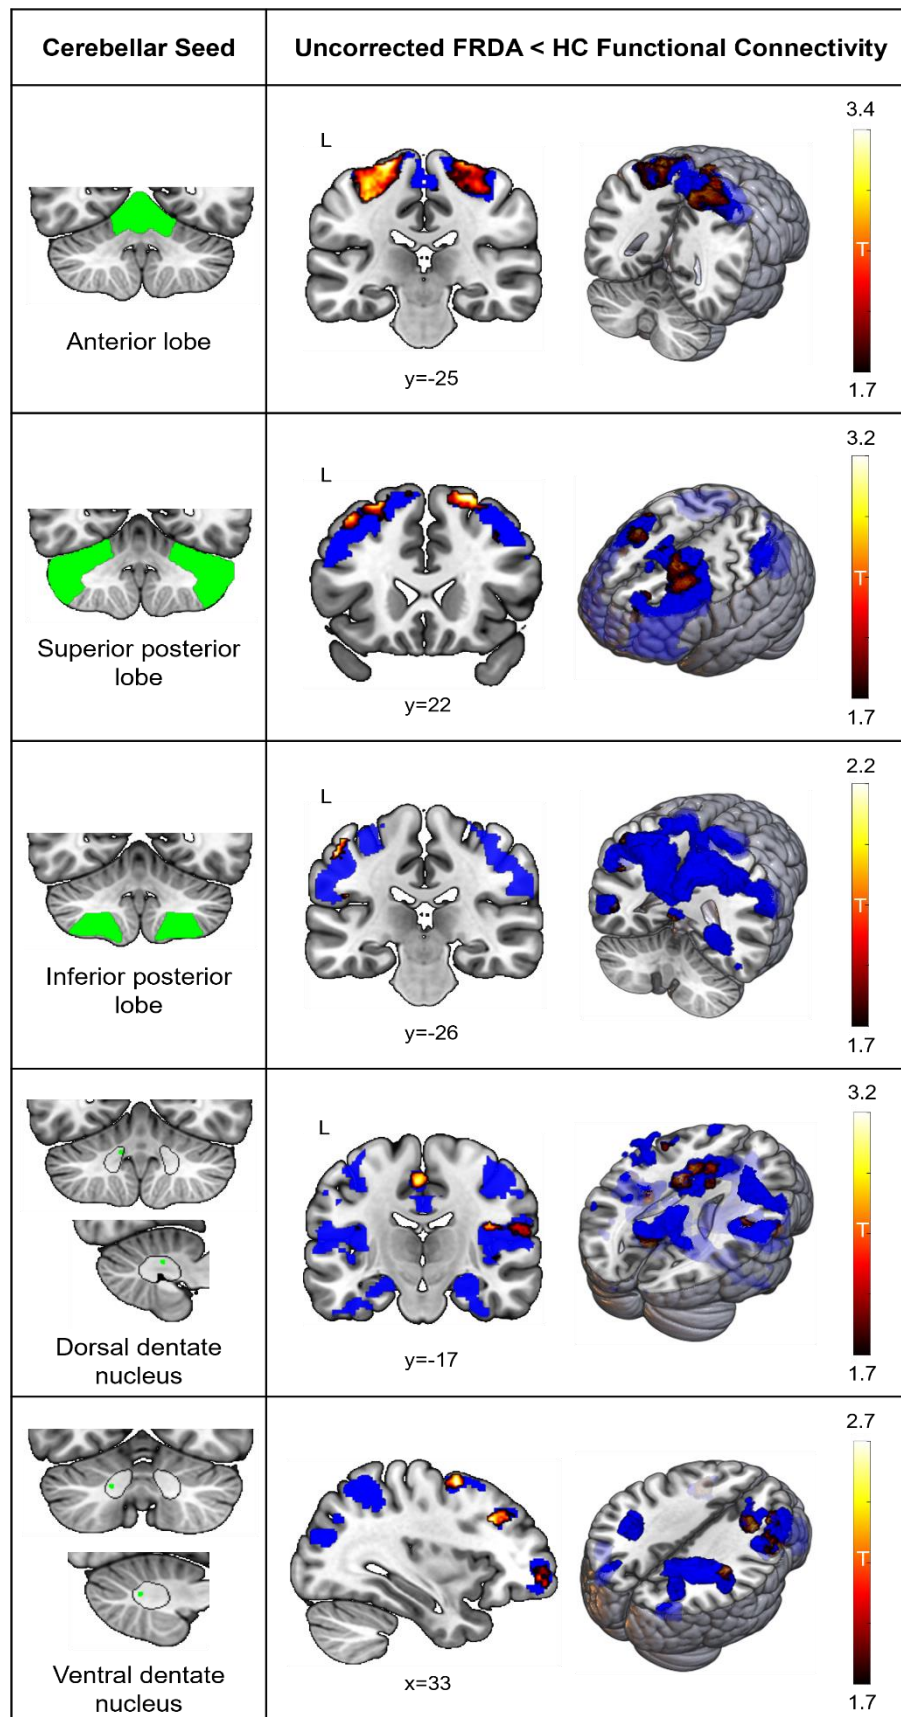

**Supplementary Fig. 1** Uncorrected group differences in cerebello-cerebral functional connectivity. **Left panel:** Coronal and sagittal sections displaying the five cerebellar seeds of interest in green. For the final two seeds, the dentate nucleus is further outlined in black within the cerebellum. **Right panel:** Yellow-black colouring on coronal or sagittal sections and 3D renderings represents between-group differences (FRDA < HC) in cerebello-cerebral functional connectivity at a height threshold of  $p < .05$  uncorrected for the seed shown in the left panel. Blue colouring represents the explicit masks used in restricting these inferences to relevant cerebral grey matter regions. x and y = MNI coordinates.

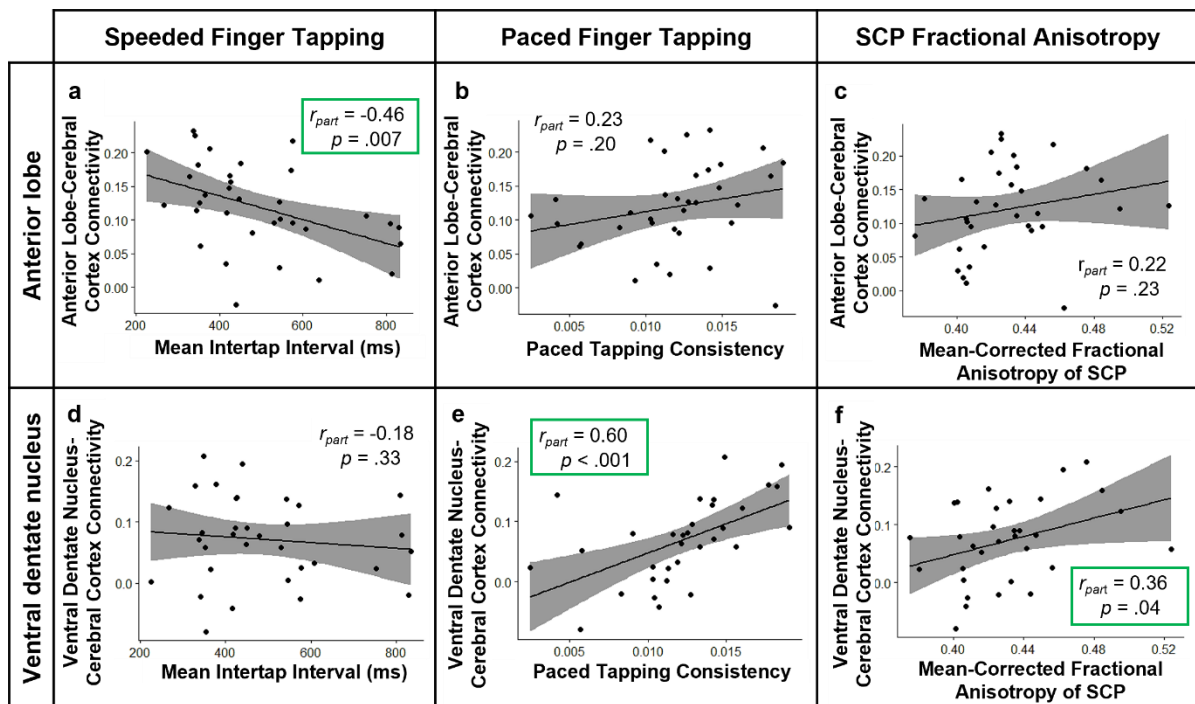

**Supplementary Fig. 2** Correlations between cerebello-cerebral connectivity, measures of psychomotor function, and fractional anisotropy of the superior cerebellar peduncles. Statistically significant correlations in this figure are denoted by a green outline. SCP = superior cerebellar peduncles, ms = milliseconds,  $r_{part}$  = partial correlation, controlling for the effect of site.

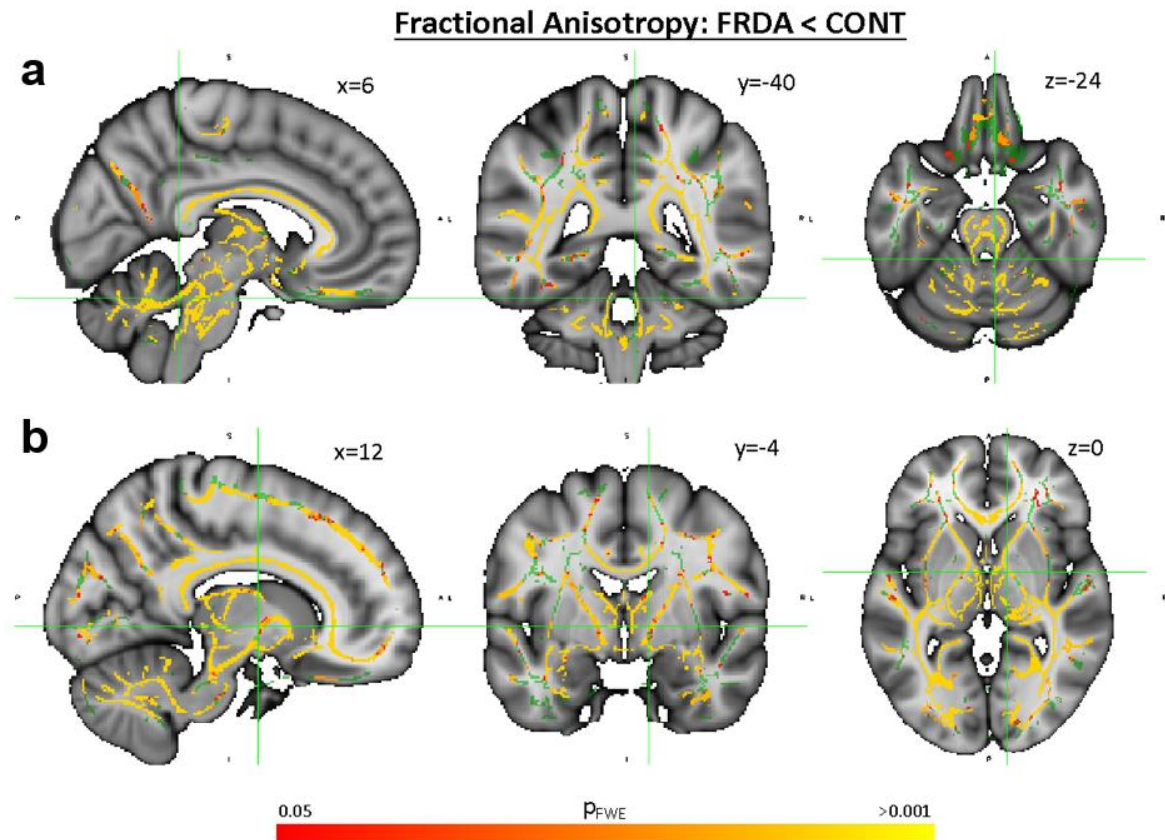

**Supplementary Fig. 3** Group differences in fractional anisotropy at the level of the (a) cerebellum and (b) basal ganglia. Yellow-red colouring represents sections of the white matter skeleton that have significantly smaller fractional anisotropy in people with Friedreich ataxia (FRDA) relative to healthy controls (CONT) at family-wise error-corrected significance ( $p_{\text{FWE}} < 0.05$ ). Areas of the skeleton that are not significantly different are depicted in green. No areas showed increased fractional anisotropy in the FRDA relative to CONT groups

**Supplementary Table 1.** FRDA significant between-group cluster values correlated with measures of disease severity, psychomotor function and white matter integrity

|                            | Age at onset |     | Disease duration |     | SARA         |            | PTAP       |     | STAP         |            | FA_SCP     |     | FA_MCP     |     | FA_CST     |     |
|----------------------------|--------------|-----|------------------|-----|--------------|------------|------------|-----|--------------|------------|------------|-----|------------|-----|------------|-----|
|                            | $r_{part}$   | $p$ | $r_{part}$       | $p$ | $r_{part}$   | $p$        | $r_{part}$ | $p$ | $r_{part}$   | $p$        | $r_{part}$ | $p$ | $r_{part}$ | $p$ | $r_{part}$ | $p$ |
| Anterior lobe              | -0.04        | .84 | -0.34            | .05 | <b>-0.36</b> | <b>.04</b> | 0.17       | .35 | <b>-0.41</b> | <b>.02</b> | 0.20       | .26 | 0.20       | .29 | 0.29       | .10 |
| Superior<br>posterior lobe | 0.19         | .27 | -0.22            | .21 | <b>-0.41</b> | <b>.02</b> | 0.27       | .13 | -0.28        | .11        | 0.30       | .09 | -0.11      | .54 | 0.13       | .47 |

*Note.* Significant partial correlations ( $r_{part}$ ) are bolded, with site included as a covariate. SARA = Scale for the Assessment and Rating of Ataxia, PTAP = Paced finger tapping task, STAP = Speeded finger tapping task, FA\_SCP = Fractional anisotropy of the superior cerebellar peduncles, FA\_MCP = Fractional anisotropy of the middle cerebellar peduncles, FA\_CST = Fractional anisotropy of the corticospinal tract.

**Supplementary Table 2.** Correlating cerebellar connectivity in individuals with FRDA with measures of disease severity, psychomotor function and white matter integrity

|                         | Age at onset            |            | Disease duration        |            | SARA                    |          | PTAP                    |                 | STAP                    |             | FA_SCP                  |            | FA_MCP                  |          | FA_CST                  |            |
|-------------------------|-------------------------|------------|-------------------------|------------|-------------------------|----------|-------------------------|-----------------|-------------------------|-------------|-------------------------|------------|-------------------------|----------|-------------------------|------------|
|                         | <i>r<sub>part</sub></i> | <i>p</i>   | <i>r<sub>part</sub></i> | <i>p</i>   | <i>r<sub>part</sub></i> | <i>p</i> | <i>r<sub>part</sub></i> | <i>p</i>        | <i>r<sub>part</sub></i> | <i>p</i>    | <i>r<sub>part</sub></i> | <i>p</i>   | <i>r<sub>part</sub></i> | <i>p</i> | <i>r<sub>part</sub></i> | <i>p</i>   |
| Anterior lobe           | <b>0.02</b>             | <b>.93</b> | <b>-0.35</b>            | <b>.04</b> | -0.32                   | .08      | 0.23                    | .20             | <b>-0.46</b>            | <b>.007</b> | 0.22                    | .23        | 0.26                    | .16      | 0.31                    | .09        |
| Superior posterior lobe | 0.06                    | .74        | -0.13                   | .46        | -0.21                   | .25      | 0.18                    | .31             | -0.19                   | .30         | -0.03                   | .88        | 0.04                    | .82      | 0.20                    | .28        |
| Inferior posterior lobe | -0.33                   | .05        | -0.26                   | .14        | -0.09                   | .61      | 0.26                    | .15             | 0.04                    | .83         | -0.02                   | .91        | 0.00                    | .99      | <b>0.40</b>             | <b>.02</b> |
| Dorsal dentate          | 0.12                    | .53        | 0.24                    | .18        | 0.09                    | .65      | 0.05                    | .79             | -0.11                   | .56         | -0.25                   | .18        | -0.21                   | .26      | -0.04                   | .83        |
| Ventral dentate         | 0.22                    | .23        | 0.01                    | .94        | -0.24                   | .20      | <b>0.60</b>             | <b>&lt;.001</b> | -0.18                   | .33         | <b>0.36</b>             | <b>.04</b> | 0.21                    | .25      | 0.12                    | .52        |

*Note.* Significant partial correlations ( $r_{part}$ ) are bolded, with site included as a covariate. SARA = Scale for the Assessment and Rating of Ataxia, PTAP = Paced finger tapping task, STAP = Speeded finger tapping task, FA\_SCP = Fractional anisotropy of the superior cerebellar peduncles, FA\_MCP = Fractional anisotropy of the middle cerebellar peduncles, FA\_CST = Fractional anisotropy of the corticospinal tract.

**Supplementary Table 3.** Correlating healthy control cerebellar connectivity with measures of psychomotor function and white matter integrity

|                         | PTAP       |     | STAP       |     | FA_SCP     |      | FA_MCP     |     | FA_CST     |     |
|-------------------------|------------|-----|------------|-----|------------|------|------------|-----|------------|-----|
|                         | $r_{part}$ | $p$ | $r_{part}$ | $p$ | $r_{part}$ | $p$  | $r_{part}$ | $p$ | $r_{part}$ | $p$ |
| Anterior lobe           | 0.20       | .20 | 0.02       | .89 | 0.03       | .85  | -0.00      | .99 | 0.06       | .71 |
| Superior posterior lobe | 0.14       | .38 | 0.12       | .43 | 0.00       | 1.00 | 0.06       | .71 | 0.06       | .72 |
| Inferior posterior lobe | 0.10       | .52 | -0.11      | .48 | 0.05       | .76  | 0.17       | .26 | 0.03       | .83 |
| Dorsal dentate          | 0.15       | .41 | 0.17       | .36 | -0.16      | .39  | 0.05       | .77 | 0.07       | .71 |
| Ventral dentate         | 0.27       | .13 | -0.06      | .75 | -0.21      | .25  | -0.01      | .95 | -0.09      | .61 |

*Note.* Site was included as a covariate in the partial correlations ( $r_{part}$ ). PTAP = Paced finger tapping task, STAP = Speeded finger tapping task, FA\_SCP = Fractional anisotropy of the superior cerebellar peduncles, FA\_MCP = Fractional anisotropy of the middle cerebellar peduncles, FA\_CST = Fractional anisotropy of the corticospinal tract.
